# Supplementary material
Source: publisher figshare collection journal article supplement (https://gsajournals.figshare.com/ndownloader/files/28102758)
Supplement: Supplementary file 1 [file 28102758]

**Figure S7.** Genome-wide association study conducted within the Wisconsin location for 15 fresh kernel elemental phenotypes in sweet corn. Each point represents a SNP with its -log10 *P*-value (y-axis) from a mixed linear model analysis plotted as a function of physical position (B73 RefGen_v4) across the 10 chromosomes of maize (x-axis). The red horizontal dashed line indicates the -log10 *P*-value of the least statistically significant SNP at 5% false discovery rate.
